# Supplementary material for: Enhanced Carbonylation of Photosynthetic and Glycolytic Proteins in Antibiotic Timentin-Treated Tobacco In Vitro Shoot Culture
Source: Plants (Basel). 2022 Jun 14;11(12):1572. doi: 10.3390/plants11121572 (PMC9228549; doi:10.3390/plants11121572)
Supplement: Supplementary file 1 [file plants-11-01572-s001.zip › Supplementary Materials-Tables-S2-S3.xls]

## Sheet: Table S2
Table S2. Gene ontology (GO) terms associated with proteoforms differentially expressed between timentin-treated tobacco in vitro shoot samples collected at the early and late stages of the propagation cycle.
No.	Peptide ID 1	UniProtKB ID	Ontology	GO ID	GO description	ARGOT score	ARGOT PPV	ARGOT rank	goclasscount
1	Nitab4.5_0009646g0060.1	A0A5A7QXG4	BP	0006006	glucose metabolic process	7.74732	0.70885	1	99
			BP	0009744	response to sucrose	0.298889	0.384082	9	2
			BP	0009409	response to cold	0.242128	0.376148	12	2
			BP	0009416	response to light stimulus	0.195429	0.368889	13	2
			CC	0010319	stromule	0.344321	0.389902	1	2
			CC	0009507	chloroplast	0.0580313	0.339678	9	1
			CC	0016021	integral component of membrane	0.00961953	0.318941	13	1
			MF	0016620	oxidoreductase activity, acting on the aldehyde or oxo group of donors, NAD or NADP as acceptor	7.39228	0.699481	1	100
			MF	0050661	NADP binding	7.23987	0.69539	2	99
			MF	0051287	NAD binding	6.67322	0.679789	4	100
			MF	0003729	mRNA binding	0.0997127	0.35055	15	2
2	Nitab4.5_0006485g0040.1	A0A1U7WUG0	BP	0006006	glucose metabolic process	7.84079	0.71128	1	100
			CC	0009507	chloroplast	0.0621273	0.340892	1	1
			MF	0016620	oxidoreductase activity, acting on the aldehyde or oxo group of donors, NAD or NADP as acceptor	7.39233	0.699482	1	100
			MF	0050661	NADP binding	7.32722	0.69774	2	100
			MF	0051287	NAD binding	6.67326	0.67979	4	100
3-4	Nitab4.5_0000722g0100.1	A0A1S4AW82	BP	0050790	regulation of catalytic activity	0.526379	0.410046	1	3
			BP	0009408	response to heat	0.256158	0.378189	3	1
			CC	0009570	chloroplast stroma	11.0563	0.787504	1	36
			MF	0016887	ATP hydrolysis activity	6.07742	0.662653	1	36
			MF	0005524	ATP binding	2.99645	0.556045	6	36
			MF	0046863	ribulose-1,5-bisphosphate carboxylase/oxygenase activator activity	1.70859	0.494495	19	3
5	Nitab4.5_0023724g0010.1	A0A1S4CKB3	BP	0050790	regulation of catalytic activity	1.30874	0.470809	1	20
			BP	0009408	response to heat	0.0890429	0.348028	4	1
			CC	0009570	chloroplast stroma	11.0566	0.787511	1	100
			CC	0016021	integral component of membrane	0.00855346	0.318129	12	1
			MF	0016887	ATP hydrolysis activity	6.0776	0.662659	1	100
			MF	0046863	ribulose-1,5-bisphosphate carboxylase/oxygenase activator activity	4.24806	0.603969	6	20
			MF	0005524	ATP binding	2.99654	0.556049	7	100
			MF	0042802	identical protein binding	0.10488	0.351723	28	1
6	Nitab4.5_0000527g0230.1	A0A067EMC5	CC	0009570	chloroplast stroma	11.0551	0.787479	1	18
			MF	0016887	ATP hydrolysis activity	5.51299	0.645626	1	16
			MF	0005524	ATP binding	2.71816	0.544089	6	16
			MF	0004633	phosphopantothenoylcysteine decarboxylase activity	0.783597	0.433232	23	1
7	Nitab4.5_0002564g0010.1	A0A1J6IUU2	BP	1902600	proton transmembrane transport	5.23391	0.636885	1	91
			CC	0033178	proton-transporting two-sector ATPase complex, catalytic domain	8.24263	0.721569	1	91
			MF	0046961	proton-transporting ATPase activity, rotational mechanism	9.18527	0.744761	1	91
8	Nitab4.5_0009806g0020.1	A0A1U7X8J9	BP	0006542	glutamine biosynthetic process	10.1509	0.767315	1	100
			CC	0005737	cytoplasm	0.562704	0.41362	1	28
			MF	0004356	glutamate-ammonia ligase activity	10.1888	0.768178	1	100
			MF	0005524	ATP binding	2.9643	0.554693	6	99
			MF	0003729	mRNA binding	0.0980652	0.35017	23	2
9	Nitab4.5_0001317g0050.1	A0A1S3WYR8	BP	0006096	glycolytic process	7.49494	0.702213	1	100
			BP	0030388	fructose 1,6-bisphosphate metabolic process	3.47939	0.575543	33	26
			CC	0005829	cytosol	1.7462	0.496573	1	26
			CC	0016021	integral component of membrane	0.0090064	0.31848	4	1
			MF	0004332	fructose-bisphosphate aldolase activity	10.8911	0.783884	1	100
10	Nitab4.5_0003337g0010.1	A0A1U7YDQ8	BP	0015976	carbon utilization	11.3157	0.793136	1	100
			BP	2000122	negative regulation of stomatal complex development	0.560706	0.413426	2	3
			BP	0010037	response to carbon dioxide	0.486594	0.405986	3	3
			BP	0010119	regulation of stomatal movement	0.397747	0.396274	6	3
			BP	0009409	response to cold	0.319736	0.386804	8	3
			BP	0050832	defense response to fungus	0.318792	0.386682	9	3
			BP	0015979	photosynthesis	0.189158	0.367851	21	3
			BP	0005983	starch catabolic process	0.127509	0.356549	30	1
			BP	0046838	phosphorylated carbohydrate dephosphorylation	0.0801549	0.345809	37	1
			BP	0006470	protein dephosphorylation	0.0688604	0.342802	41	1
			BP	0006357	regulation of transcription by RNA polymerase II	0.0604852	0.34041	46	1
			CC	0009570	chloroplast stroma	0.486956	0.406024	1	4
			CC	0010319	stromule	0.454684	0.402609	3	3
			CC	0048046	apoplast	0.189117	0.367844	9	2
			CC	0009941	chloroplast envelope	0.182207	0.36668	10	2
			CC	0009535	chloroplast thylakoid membrane	0.126005	0.356242	17	2
			CC	0005829	cytosol	0.11254	0.35341	25	2
			CC	0005886	plasma membrane	0.0695532	0.342993	29	3
			CC	0005634	nucleus	0.0351437	0.33192	31	1
			CC	0016021	integral component of membrane	0.00852219	0.318104	33	1
			MF	0004089	carbonate dehydratase activity	10.5681	0.776725	1	100
			MF	0008270	zinc ion binding	5.1238	0.633372	4	100
			MF	0003729	mRNA binding	0.131673	0.357388	12	3
			MF	0008138	protein tyrosine/serine/threonine phosphatase activity	0.0880008	0.347773	14	1
			MF	0019203	carbohydrate phosphatase activity	0.0854262	0.347139	15	1
			MF	0000981	DNA-binding transcription factor activity, RNA polymerase II-specific	0.0708011	0.343336	17	1
			MF	0043565	sequence-specific DNA binding	0.0556874	0.338965	19	1
11	Nitab4.5_0007257g0020.1	A0A1S3X3G9	BP	0050896	response to stimulus	3.03207	0.557535	1	71
			BP	0006878	cellular copper ion homeostasis	0.964546	0.447303	3	5
			BP	0006825	copper ion transport	0.146271	0.360232	23	1
			CC	0005874	microtubule	0.0961479	0.349723	1	1
			CC	0005829	cytosol	0.0913086	0.348576	3	1
			CC	0009507	chloroplast	0.0811941	0.346074	8	1
			CC	0005739	mitochondrion	0.0554248	0.338884	13	1
			CC	0016021	integral component of membrane	0.0115631	0.320314	20	1
			MF	0046872	metal ion binding	2.53711	0.535979	1	72
			MF	0019904	protein domain specific binding	0.800601	0.43462	5	5
			MF	0016531	copper chaperone activity	0.203123	0.37014	7	1
			MF	0008017	microtubule binding	0.10867	0.352565	10	1
12-13	Nitab4.5_0003337g0100.1	A0A1U7XKK2	BP	0000413	protein peptidyl-prolyl isomerization	9.50195	0.752282	1	100
			CC	0009579	thylakoid	6.97811	0.688262	1	100
			CC	0016021	integral component of membrane	0.00897176	0.318453	4	1
			MF	0003755	peptidyl-prolyl cis-trans isomerase activity	8.34987	0.724272	1	100
14	Nitab4.5_0004193g0010.1	A0A1U7WU25	BP	1901700	response to oxygen-containing compound	7.9729	0.714692	1	39
			BP	0009651	response to salt stress	0.333635	0.388569	5	1
			BP	0006890	retrograde vesicle-mediated transport, Golgi to endoplasmic reticulum	0.29092	0.383017	8	1
			BP	0007267	cell-cell signaling	0.275653	0.380934	9	1
			BP	0006888	endoplasmic reticulum to Golgi vesicle-mediated transport	0.250684	0.377399	10	1
			BP	0061025	membrane fusion	0.211994	0.371554	12	1
			BP	0010033	response to organic substance	0.191506	0.368242	14	1
			CC	0005789	endoplasmic reticulum membrane	0.179333	0.366189	1	1
			CC	0009536	plastid	0.147199	0.360408	6	1
			CC	0005886	plasma membrane	0.0845334	0.346916	14	1
			CC	0016021	integral component of membrane	0.0228616	0.326654	18	1
			MF	0048032	galacturonate binding	0.821366	0.436294	1	1
			MF	0005484	SNAP receptor activity	0.297544	0.383903	2	1
			MF	0005515	protein binding	0.129362	0.356924	6	1
15-17	Nitab4.5_0002814g0040.1	NA
18	Nitab4.5_0005511g0010.1	A0A1S4BMB0	BP	0009765	photosynthesis, light harvesting	12.8149	0.824486	1	100
			BP	0009416	response to light stimulus	2.73218	0.544706	6	28
			CC	0009522	photosystem I	9.84251	0.760233	1	100
			CC	0009523	photosystem II	8.64241	0.731559	2	100
			CC	0009535	chloroplast thylakoid membrane	7.47657	0.701725	4	100
			CC	0016021	integral component of membrane	0.0368212	0.332562	28	4
			MF	0016168	chlorophyll binding	10.1678	0.767699	1	100
			MF	0046872	metal ion binding	0.102652	0.351221	6	4
19	Nitab4.5_0000441g0070.1	A0A1S3ZSU2	BP	0009765	photosynthesis, light harvesting	12.8149	0.824486	1	100
			BP	0009416	response to light stimulus	2.635	0.540399	6	27
			CC	0009522	photosystem I	9.84251	0.760233	1	100
			CC	0009523	photosystem II	8.64241	0.731559	2	100
			CC	0009535	chloroplast thylakoid membrane	7.47657	0.701725	4	100
			CC	0016021	integral component of membrane	0.0458239	0.335782	28	5
			MF	0016168	chlorophyll binding	10.1678	0.767699	1	100
			MF	0046872	metal ion binding	0.102782	0.351251	6	4
20	Nitab4.5_0008321g0040.1	A0A1S3XWU9	BP	0015979	photosynthesis	7.12079	0.692163	1	53
			BP	0006091	generation of precursor metabolites and energy	0.0811866	0.346072	6	1
			CC	0009654	photosystem II oxygen evolving complex	12.8391	0.824977	1	53
			CC	0019898	extrinsic component of membrane	9.81946	0.759699	2	53
			CC	0009534	chloroplast thylakoid	1.34948	0.473375	12	9
			CC	0055035	plastid thylakoid membrane	1.20313	0.463966	16	8
			CC	0031978	plastid thylakoid lumen	0.312156	0.385825	32	1
			CC	0048046	apoplast	0.221853	0.373091	34	1
			CC	0009570	chloroplast stroma	0.218596	0.372587	35	1
			CC	0009941	chloroplast envelope	0.213747	0.37183	37	1
			MF	0005509	calcium ion binding	6.99292	0.688669	1	53
			MF	0008266	poly(U) RNA binding	0.629527	0.419906	6	2
			MF	1901149	salicylic acid binding	0.43548	0.400519	9	1
			MF	0019904	protein domain specific binding	0.406724	0.397301	10	2
			MF	0032440	2-alkenal reductase [NAD(P)+] activity	0.282812	0.381917	11	1
			MF	0003729	mRNA binding	0.196005	0.368984	13	2
21	Nitab4.5_0004422g0010.1	A0A1U7VE07	BP	0009734	auxin-activated signaling pathway	11.3431	0.793727	1	1
			CC	0048046	apoplast	11.1874	0.790359	1	1
			MF	0030145	manganese ion binding	8.67454	0.732351	1	1
22	Nitab4.5_0001313g0070.1	NA
1 The protein ID and name are based on the N. tabacum genome database. Abbreviations: BP - biological process; CC - cellular compartment; MF - molecular function; NA - not available.

## Sheet: Table S3
Table S3. Gene ontology (GO) terms associated with proteoforms differentially carbonylated between timentin-treated and control tobacco in vitro shoot samples.
No.	Peptide ID 1	UniProtKB ID	Ontology	GO ID	GO description	ARGOT score	ARGOT PPV	ARGOT rank	goclasscount
1	Nitab4.5_0003983g0050.1	A0A1U7XP58	BP	6414	translational elongation	7.47897	0.701789	1	100
			BP	32790	ribosome disassembly	2.49528	0.534064	10	16
			BP	32543	mitochondrial translation	1.88729	0.504174	17	16
			BP	43086	negative regulation of catalytic activity	0.0792727	0.345582	34	1
			CC	9507	chloroplast	5.93798	0.658523	1	100
			CC	5739	mitochondrion	0.750967	0.430528	9	16
			MF	3746	translation elongation factor activity	8.02684	0.716076	1	100
			MF	3924	GTPase activity	6.71473	0.680954	5	100
			MF	5525	GTP binding	5.98148	0.659817	6	100
			MF	4857	enzyme inhibitor activity	0.0837753	0.346727	29	1
2	Nitab4.5_0001329g0110.1	A0A1S3ZDI1	BP	6098	pentose-phosphate shunt	1.54163	0.484984	1	17
			BP	6281	DNA repair	0.054243	0.338517	14	1
			CC	5829	cytosol	1.15211	0.460553	1	17
			CC	9536	plastid	0.117508	0.354474	4	2
			MF	4802	transketolase activity	11.446	0.795939	1	100
			MF	46872	metal ion binding	2.53731	0.535988	3	100
			MF	8094	ATP-dependent activity, acting on DNA	0.0648782	0.341684	9	1
			MF	140299	small molecule sensor activity	0.0622982	0.340941	10	1
			MF	3677	DNA binding	0.0318813	0.330626	12	1
			MF	5524	ATP binding	0.0294893	0.329634	13	1
3	Nitab4.5_0002354g0050.1	A0A1U7X3B4	BP	15986	proton motive force-driven ATP synthesis	7.16515	0.693369	1	95
			BP	1902600	proton transmembrane transport	5.23401	0.636888	16	100
			BP	90377	seed trichome initiation	0.213301	0.37176	66	1
			BP	90378	seed trichome elongation	0.192428	0.368394	67	1
			BP	16126	sterol biosynthetic process	0.114431	0.353818	77	1
			BP	6508	proteolysis	0.0433969	0.334948	107	1
			BP	44260	cellular macromolecule metabolic process	0.0235745	0.326994	110	1
			CC	33180	proton-transporting V-type ATPase, V1 domain	12.0968	0.809711	1	100
			CC	325	plant-type vacuole	2.84254	0.549505	7	20
			CC	9536	plastid	0.935077	0.445108	9	16
			CC	5774	vacuolar membrane	0.0892216	0.348071	19	1
			CC	5789	endoplasmic reticulum membrane	0.0707788	0.343329	21	1
			CC	16021	integral component of membrane	0.0181866	0.324281	29	2
			MF	46961	proton-transporting ATPase activity, rotational mechanism	9.18545	0.744765	1	100
			MF	46933	proton-transporting ATP synthase activity, rotational mechanism	7.77167	0.709484	6	95
			MF	5524	ATP binding	2.99656	0.55605	24	100
			MF	16628	oxidoreductase activity, acting on the CH-CH group of donors, NAD or NADP as acceptor	0.0874777	0.347645	41	1
			MF	16787	hydrolase activity	0.0728967	0.343903	42	3
			MF	140096	catalytic activity, acting on a protein	0.0347245	0.331757	54	1
4	Nitab4.5_0023724g0010.1	A0A1S4CKB3	BP	50790	regulation of catalytic activity	1.30874	0.470809	1	20
			BP	9408	response to heat	0.0890429	0.348028	4	1
			CC	9570	chloroplast stroma	11.0566	0.787511	1	100
			CC	16021	integral component of membrane	0.00855346	0.318129	12	1
			MF	16887	ATP hydrolysis activity	6.0776	0.662659	1	100
			MF	46863	ribulose-1,5-bisphosphate carboxylase/oxygenase activator activity	4.24806	0.603969	6	20
			MF	5524	ATP binding	2.99654	0.556049	7	100
			MF	42802	identical protein binding	0.10488	0.351723	28	1
5	Nitab4.5_0000249g0010.1	Q9ZP50	BP	6508	proteolysis	4.38875	0.608884	1	2
			CC	9534	chloroplast thylakoid	3.74165	0.585565	1	1
			CC	16021	integral component of membrane	0.909809	0.443197	13	2
			MF	4176	ATP-dependent peptidase activity	9.01577	0.740682	1	2
			MF	4222	metalloendopeptidase activity	7.41227	0.700014	2	2
			MF	16887	ATP hydrolysis activity	6.07552	0.662597	4	2
			MF	5524	ATP binding	2.99552	0.556006	12	2
6	Nitab4.5_0004126g0010.1	A0A1S4DSL7	BP	42026	protein refolding	10.0961	0.766063	1	68
			CC	9507	chloroplast	0.077671	0.345167	1	1
			MF	44183	protein folding chaperone	8.51339	0.72836	1	68
			MF	5524	ATP binding	2.99654	0.556049	2	68
7	Nitab4.5_0000697g0210.1	A0A8B8KBG9	BP	6730	one-carbon metabolic process	8.04969	0.716661	1	32
			MF	4013	adenosylhomocysteinase activity	11.7434	0.80228	1	32
8-9	Nitab4.5_0002183g0050.1	I1QRU1	BP	9853	photorespiration	9.44795	0.751009	1	99
			MF	16831	carboxy-lyase activity	7.01842	0.689368	1	100
			CC	9507	chloroplast	5.80419	0.654514	1	98
			BP	19253	reductive pentose-phosphate cycle	9.28534	0.747151	2	100
			MF	4497	monooxygenase activity	6.62153	0.678334	2	100
			MF	287	magnesium ion binding	5.64169	0.649583	4	100
10	Nitab4.5_0010922g0010.1	A0A2G2VY00	BP	6096	glycolytic process	7.4949	0.702211	1	100
			BP	18105	peptidyl-serine phosphorylation	0.117071	0.354381	51	1
			BP	9737	response to abscisic acid	0.111621	0.353211	53	1
			BP	9409	response to cold	0.109773	0.352808	54	1
			BP	46777	protein autophosphorylation	0.107655	0.352341	55	1
			BP	9416	response to light stimulus	0.0886016	0.34792	58	1
			BP	35556	intracellular signal transduction	0.0448879	0.335463	70	1
			CC	15	phosphopyruvate hydratase complex	10.4994	0.775189	1	100
			CC	5634	nucleus	0.0731579	0.343973	7	2
			CC	5740	mitochondrial envelope	0.0453038	0.335605	10	1
			MF	4634	phosphopyruvate hydratase activity	11.0658	0.787712	1	100
			MF	287	magnesium ion binding	5.64168	0.649582	4	100
			MF	9931	calcium-dependent protein serine/threonine kinase activity	0.119162	0.354823	11	1
			MF	4683	calmodulin-dependent protein kinase activity	0.11698	0.354362	13	1
			MF	5516	calmodulin binding	0.0937026	0.349147	14	1
			MF	3677	DNA binding	0.0295446	0.329658	22	1
11	Nitab4.5_0000565g0160.1	A0A1U7V771	BP	6065	UDP-glucuronate biosynthetic process	10.9888	0.786028	1	98
			BP	6024	glycosaminoglycan biosynthetic process	1.22841	0.46563	29	18
			CC	5829	cytosol	1.20882	0.464342	1	18
			CC	5634	nucleus	0.718985	0.427819	2	18
			CC	16021	integral component of membrane	0.00920815	0.318633	9	1
			MF	3979	UDP-glucose 6-dehydrogenase activity	11.4062	0.795085	1	100
			MF	51287	NAD binding	6.67327	0.67979	2	100
12	Nitab4.5_0000578g0090.1	A0A1S3ZGP8	BP	6556	S-adenosylmethionine biosynthetic process	10.8941	0.783951	1	100
			BP	6730	one-carbon metabolic process	8.04996	0.716668	3	100
			CC	5737	cytoplasm	1.99947	0.510017	1	100
			CC	16021	integral component of membrane	0.0181343	0.324253	5	2
			MF	4478	methionine adenosyltransferase activity	11.2699	0.792146	1	100
			MF	5524	ATP binding	2.99655	0.556049	3	100
			MF	46872	metal ion binding	2.53729	0.535987	11	100
13	Nitab4.5_0001592g0070.1		BP	19853	L-ascorbic acid biosynthetic process	0.539797	0.41138	1	1
			MF	47918	GDP-mannose 3,5-epimerase activity	17.1963	0.863401	1	24
			MF	51287	NAD binding	6.67299	0.679782	4	24
14	Nitab4.5_0000029g0330.1	A0A1S4AGN4	BP	6096	glycolytic process	7.49494	0.702213	1	100
			BP	6094	gluconeogenesis	1.88996	0.504315	43	22
			BP	9749	response to glucose	0.136483	0.358342	61	1
			BP	2237	response to molecule of bacterial origin	0.124822	0.355999	65	1
			BP	9416	response to light stimulus	0.09552	0.349576	67	1
			BP	9408	response to heat	0.09179	0.348691	69	1
			CC	5829	cytosol	1.54901	0.485415	1	23
			CC	5634	nucleus	0.03905	0.333393	4	1
			MF	4618	phosphoglycerate kinase activity	11.2903	0.792587	1	100
			MF	5524	ATP binding	2.99654	0.556049	5	100
			MF	43531	ADP binding	2.19532	0.519837	18	22
			MF	4672	protein kinase activity	0.0522635	0.337894	24	1
15	Nitab4.5_0000369g0010.1	A0A1J6KTQ5	BP	5975	carbohydrate metabolic process	4.06975	0.597621	1	71
			BP	30388	fructose 1,6-bisphosphate metabolic process	2.49233	0.533929	5	13
			BP	6002	fructose 6-phosphate metabolic process	2.02987	0.511572	8	13
			BP	44283	small molecule biosynthetic process	0.733825	0.429084	24	13
			BP	44249	cellular biosynthetic process	0.444552	0.401512	38	16
			BP	1901576	organic substance biosynthetic process	0.436161	0.400594	39	16
			BP	15977	carbon fixation	0.233816	0.374911	44	2
			BP	15979	photosynthesis	0.186913	0.367475	47	2
			BP	44260	cellular macromolecule metabolic process	0.174351	0.365329	48	5
			CC	5737	cytoplasm	0.374531	0.393561	1	13
			CC	48046	apoplast	0.15128	0.361175	4	1
			CC	43231	intracellular membrane-bounded organelle	0.106451	0.352074	9	3
			CC	9579	thylakoid	0.0940745	0.349235	12	1
			CC	31967	organelle envelope	0.0626838	0.341053	17	1
			CC	16021	integral component of membrane	0.0125077	0.320939	20	1
			MF	16791	phosphatase activity	6.62111	0.678322	1	71
			MF	46872	metal ion binding	2.50565	0.534541	4	70
16	Nitab4.5_0012115g0030.1	Q9SXX5	BP	6096	glycolytic process	7.49494	0.702212	1	100
			BP	30388	fructose 1,6-bisphosphate metabolic process	3.36209	0.570939	36	25
			CC	5829	cytosol	1.68733	0.493311	1	25
			CC	16021	integral component of membrane	0.00905356	0.318516	4	1
			MF	4332	fructose-bisphosphate aldolase activity	10.8911	0.783884	1	100
17	Nitab4.5_0012714g0020.1	A0A1S4DGM0	BP	6096	glycolytic process	7.49494	0.702213	1	100
			BP	30388	fructose 1,6-bisphosphate metabolic process	3.871	0.590379	32	29
			CC	5829	cytosol	1.94274	0.507083	1	29
			CC	16021	integral component of membrane	0.00910678	0.318556	4	1
			MF	4332	fructose-bisphosphate aldolase activity	10.8911	0.783884	1	100
18	Nitab4.5_0010299g0040.1	A0A1S3YV19	BP	6006	glucose metabolic process	7.84077	0.71128	1	100
			BP	19253	reductive pentose-phosphate cycle	0.0988511	0.350352	9	1
			CC	9507	chloroplast	0.0632147	0.341207	1	1
			CC	16021	integral component of membrane	0.00887625	0.31838	9	1
			MF	16620	oxidoreductase activity, acting on the aldehyde or oxo group of donors, NAD or NADP as acceptor	7.39231	0.699481	1	100
			MF	50661	NADP binding	7.3272	0.697739	2	100
			MF	51287	NAD binding	6.67325	0.67979	4	100
19	Nitab4.5_0003337g0010.1	A0A1U7YDQ8	BP	15976	carbon utilization	11.3157	0.793136	1	100
			BP	2000122	negative regulation of stomatal complex development	0.560706	0.413426	2	3
			BP	10037	response to carbon dioxide	0.486594	0.405986	3	3
			BP	10119	regulation of stomatal movement	0.397747	0.396274	6	3
			BP	9409	response to cold	0.319736	0.386804	8	3
			BP	50832	defense response to fungus	0.318792	0.386682	9	3
			BP	15979	photosynthesis	0.189158	0.367851	21	3
			BP	5983	starch catabolic process	0.127509	0.356549	30	1
			BP	46838	phosphorylated carbohydrate dephosphorylation	0.0801549	0.345809	37	1
			BP	6470	protein dephosphorylation	0.0688604	0.342802	41	1
			BP	6357	regulation of transcription by RNA polymerase II	0.0604852	0.34041	46	1
			CC	9570	chloroplast stroma	0.486956	0.406024	1	4
			CC	10319	stromule	0.454684	0.402609	3	3
			CC	48046	apoplast	0.189117	0.367844	9	2
			CC	9941	chloroplast envelope	0.182207	0.36668	10	2
			CC	9535	chloroplast thylakoid membrane	0.126005	0.356242	17	2
			CC	5829	cytosol	0.11254	0.35341	25	2
			CC	5886	plasma membrane	0.0695532	0.342993	29	3
			CC	5634	nucleus	0.0351437	0.33192	31	1
			CC	16021	integral component of membrane	0.00852219	0.318104	33	1
			MF	4089	carbonate dehydratase activity	10.5681	0.776725	1	100
			MF	8270	zinc ion binding	5.1238	0.633372	4	100
			MF	3729	mRNA binding	0.131673	0.357388	12	3
			MF	8138	protein tyrosine/serine/threonine phosphatase activity	0.0880008	0.347773	14	1
			MF	19203	carbohydrate phosphatase activity	0.0854262	0.347139	15	1
			MF	981	DNA-binding transcription factor activity, RNA polymerase II-specific	0.0708011	0.343336	17	1
			MF	43565	sequence-specific DNA binding	0.0556874	0.338965	19	1
20	Nitab4.5_0003600g0030.1	A0A314L2W2	CC	5856	cytoskeleton	6.21662	0.666729	1	90
			MF	5524	ATP binding	2.99654	0.556049	1	90
			CC	5737	cytoplasm	0.0201968	0.325335	8	1
21	Nitab4.5_0002064g0070.1	A0A199VZL6	BP	48767	root hair elongation	0.552184	0.412597	1	3
			BP	9845	seed germination	0.521288	0.409535	2	3
			BP	6893	Golgi to plasma membrane transport	0.409353	0.3976	16	3
			BP	51301	cell division	0.388468	0.395199	20	6
			BP	9611	response to wounding	0.346213	0.390135	28	3
			BP	9733	response to auxin	0.345587	0.390058	29	3
			BP	9416	response to light stimulus	0.311651	0.385759	31	3
			BP	8104	protein localization	0.1727	0.365041	50	3
			BP	7010	cytoskeleton organization	0.0788016	0.34546	57	1
			BP	71705	nitrogen compound transport	0.0486348	0.336721	64	1
			BP	71702	organic substance transport	0.0448175	0.335439	65	1
			CC	5856	cytoskeleton	6.21661	0.666729	1	97
			CC	5829	cytosol	0.418424	0.398624	7	6
			CC	9506	plasmodesma	0.158011	0.362418	9	1
			CC	9505	plant-type cell wall	0.15661	0.362161	11	1
			CC	9570	chloroplast stroma	0.118226	0.354626	12	1
			CC	9941	chloroplast envelope	0.115604	0.354069	14	1
			CC	786	nucleosome	0.101475	0.350954	16	1
			CC	5730	nucleolus	0.0799606	0.345759	22	1
			CC	5739	mitochondrion	0.0496267	0.337046	34	1
			CC	5886	plasma membrane	0.027998	0.328996	40	1
			CC	16021	integral component of membrane	0.0084259	0.318028	44	1
			MF	5524	ATP binding	2.99654	0.556049	1	97
			MF	5200	structural constituent of cytoskeleton	0.111435	0.353171	17	1
			MF	5515	protein binding	0.108503	0.352529	18	2
			MF	30527	structural constituent of chromatin	0.0982258	0.350207	20	1
			MF	3677	DNA binding	0.0347667	0.331774	23	1
22-23	Nitab4.5_0000441g0070.1	A0A1S3ZSU2	BP	9765	photosynthesis, light harvesting	12.8149	0.824486	1	100
			BP	9416	response to light stimulus	2.635	0.540399	6	27
			CC	9522	photosystem I	9.84251	0.760233	1	100
			CC	9523	photosystem II	8.64241	0.731559	2	100
			CC	9535	chloroplast thylakoid membrane	7.47657	0.701725	4	100
			CC	16021	integral component of membrane	0.0458239	0.335782	28	5
			MF	16168	chlorophyll binding	10.1678	0.767699	1	100
			MF	46872	metal ion binding	0.102782	0.351251	6	4
24	Nitab4.5_0001434g0050.1	A0A1J6K2T4	BP	9765	photosynthesis, light harvesting	12.8149	0.824486	1	100
			BP	9416	response to light stimulus	3.12328	0.561309	6	32
			BP	6887	exocytosis	0.190313	0.368043	13	2
			CC	9522	photosystem I	9.84251	0.760233	1	100
			CC	9523	photosystem II	8.64241	0.731559	2	100
			CC	9535	chloroplast thylakoid membrane	7.47657	0.701725	4	100
			CC	145	exocyst	0.212688	0.371663	28	2
			CC	16021	integral component of membrane	0.0648957	0.341689	31	7
			MF	16168	chlorophyll binding	10.1678	0.767699	1	100
			MF	46872	metal ion binding	0.231872	0.374618	6	9
			MF	3676	nucleic acid binding	0.0450542	0.33552	11	2
25	Nitab4.5_0011777g0030.1	A0A1U7XTS3	BP	15995	chlorophyll biosynthetic process	11.238	0.791456	1	99
			BP	6782	protoporphyrinogen IX biosynthetic process	8.819	0.735898	3	99
			CC	9507	chloroplast	1.62733	0.489927	1	27
			CC	5829	cytosol	0.130376	0.357128	9	2
			CC	9532	plastid stroma	0.106574	0.352102	11	1
			CC	9526	plastid envelope	0.0715122	0.343529	13	1
			CC	16021	integral component of membrane	0.00886373	0.31837	16	1
			MF	16869	intramolecular transferase activity, transferring amino groups	11.838	0.804281	1	100
			MF	8483	transaminase activity	6.97685	0.688227	3	100
			MF	30170	pyridoxal phosphate binding	6.46282	0.673828	5	100
			MF	42803	protein homodimerization activity	0.188147	0.367682	17	2
26	Nitab4.5_0004607g0010.1	A0A1S4DK08	BP	6096	glycolytic process	7.49256	0.702149	1	6
			BP	46166	glyceraldehyde-3-phosphate biosynthetic process	3.11146	0.560823	36	1
			BP	19563	glycerol catabolic process	1.92275	0.506039	44	1
			BP	6094	gluconeogenesis	1.47518	0.481055	56	1
			CC	5829	cytosol	1.15781	0.460938	1	1
			MF	4807	triose-phosphate isomerase activity	11.128	0.789069	1	6
1 The protein ID and name are based on the N. tabacum genome database. Abbreviations: BP - biological process; CC - cellular compartment; MF - molecular function.
